# Supplementary material for: The Roles and Interactions of Symbiont, Host and Environment in Defining Coral Fitness
Source: PLoS One. 2009 Jul 24;4(7):e6364. doi: 10.1371/journal.pone.0006364 (PMC2710517; doi:10.1371/journal.pone.0006364)
Supplement: Table S3 — (0.05 MB DOC) [file pone.0006364.s003.doc]

**Table S3.** Temporal confirmation (by SSCP and sequencing) of *Symbiodinium* genotype in outplanted juvenile corals. See Materials and Methods section for group nomenclature. Juvenile corals that were inoculated with C2 and C but failed to take them up are marked “un”. *Symbiodinium* types taken up in the field are marked in bold.

| **Age (Weeks)** | **Group** | **Nr. genotyped** | ***Symbiodinium* type** |
| --- | --- | --- | --- |
| **At Magnetic Island** | | | |
| 9 | MKC1 | 7 | All C1 |
| 9 | MKD | 12 | All D |
| 9 | MKA | 7 | All D |
| 9 | MKun | 13 | All **D** |
|  |  |  |  |
| 13 | MMC1 | 7 | All C1 |
| 13 | MMD | 12 | All D |
| 13 | MMA | 9 | All **D** |
| 13 | MMun | 19 | All **D** |
|  |  |  |  |
| 31 | MKC1 | 5 | All C1 |
| 31 | MKD | 8 | All D |
|  |  |  |  |
| 35 | MMC1 | 8 | All C1 |
| 35 | MMD | 8 | All D |
|  |  |  |  |
| **At Keppel Islands** | | | |
| 6 | KKA | 7 | All A |
| 6 | KKC1 | 7 | All C1 |
| 6 | KKD | 10 | All D |
| 6 | KKun | 6 | All **D** |
|  |  |  |  |
| 10 | KKA | 4 | 3 A, 1 **D** |
| 10 | KKC1 | 5 | All C1 |
|  |  |  |  |
| 13 | KKA | 8 | 5 A, 1A+**D,** 1A+**C1+D,** 1 **C1+D** |
| 13 | KKun | 12 | **11D, 1 C1+D** |
|  |  |  |  |
| 31 | KKA | 14 | 10 A, 3 A**+D,** 1 **C1+D** |
| 31 | KKC1 | 11 | All C1 |
| 31 | KKD | 11 | All D |
